# Supplementary material for: Does plastic surgery need a rewiring? A survey and systematic review on robotic-assisted surgery
Source: PubMed Central journal article supplement — JPRAS Open. 2022 May 26;33:76–91. doi: 10.1016/j.jpra.2022.05.006 (PMC9260262; doi:10.1016/j.jpra.2022.05.006), 2022-05-26
Supplement: mmc1.pdf [file mmc1.pdf]

# Characterization of studies with less than 10 patients that included the use of robotic-assisted surgery

| Author (Year)            | Type of Study             | Level of Evidence | Population                                                                                                                                 | Cohort size | Control group                               | Mean age (% female)      | Inclusion Criteria                                                                                                           | Exclusion Criteria                       | Mean Follow-Up                              | Outcomes Measured                                                       | Results                                                                                                                                                                                                  | Comments                                                                                              |
|--------------------------|---------------------------|-------------------|--------------------------------------------------------------------------------------------------------------------------------------------|-------------|---------------------------------------------|--------------------------|------------------------------------------------------------------------------------------------------------------------------|------------------------------------------|---------------------------------------------|-------------------------------------------------------------------------|----------------------------------------------------------------------------------------------------------------------------------------------------------------------------------------------------------|-------------------------------------------------------------------------------------------------------|
| Chang et al., 2020       | Retrospective             | IV                | Sympathetic Nerve Reconstruction (SNR)<br>Chang Gung University, Taoyuan                                                                   | 7           | N/A                                         | Median: 41 years (29% F) | Post-operative compensatory sweating necessitating SNR                                                                       | No history of non-surgical sympathectomy | F/u every 6 months postoperatively by phone | mortality, operating time, LOS, graft type, symptom improvement         | Operative mortality (none)<br>Median operating time: 10.5h<br>LOS Median: 4 days<br>Symptom improvement of 70%                                                                                           | Short f/u period - could only assess symptom improvement in one patient                               |
| Asaad et al., 2021       | retrospective case series | IV                | Patients who underwent robotic flap harvest following robotic extirpative surgery<br>Houston, TX                                           | 7           | Open rectus abdominis muscle harvest (n=95) | 66                       | Patients who underwent open or robotic flap harvest following robotic extirpative surgery                                    | N/A                                      | 16 ± 24 months (median, 8 months)           | Outcomes/complications                                                  | No significant differences in complications and hernia recurrences between the robotic and open techniques                                                                                               | Small sample size, short f/u time, difference in surgical indications and defect types                |
| Sieffert et al., 2017    | retrospective             |                   | Patients with locally advanced low rectal cancer and underwent extralevator excision with gracilis flap reconstruction<br>Dayton, OH       | 6           | N/A                                         | 63                       | Patients with locally advanced low rectal cancers not amenable to sphincter preservation                                     | N/A                                      | N/A                                         | Demographic<br>Operative data<br>Outcomes/complications                 | No intraoperative perforation or positive circumferential resection margin.<br>Complications include locoregional recurrence, flap venous congestion, perineal abscess that went on to complete healing. | Small sample size, short f/u time                                                                     |
| Haverland et al., 2021   | case series               | IV                | Robotic-assisted rectus abdominis harvest for pelvic floor reconstruction<br>Arizona, USA                                                  | 6           | N/A                                         | 69.2 (66.6%)             | Vesicovaginal fistula, pelvic organ prolapse, exenteration, vaginectomy, partial vulvectomy, and abdominoperineal resection. | Not reported                             | 9.2 mo.                                     | Bowel obstructions, infections, emergency room visits, and readmission. | 1 patient: occasional abdominal pain<br>1 patient: intermittent bowel obstruction<br>1 patient: pelvic abscess, requiring readmission.                                                                   |                                                                                                       |
| Selber, 2010             | Case series               | IV                | Patients with SCC<br>Houston, TX                                                                                                           | 5           | N/A                                         | 70.8                     | Patients with SCC                                                                                                            | N/A                                      | N/A                                         | Outcomes/Complications                                                  | No intraoperative complications<br>Successful reconstruction                                                                                                                                             | Small sample size precluded finding sig. difference in operative times/hospital stay                  |
| Singh et al., 2015       | case series               | IV                | Robotic extralevator abdominoperineal excision with robotic rectus abdominis flap harvest for distal rectal adenocarcinoma<br>Chicago, USA | 3           | N/A                                         | 50.3 (33%)               | Not reported                                                                                                                 | Not reported                             | Not reported<br>Longest: 16 mo.             | Hernia or bulge formation<br>Infection                                  | 1 patient: parastomal hernia<br>1 patient: abdominal weakness                                                                                                                                            | Average operative time: 522 min.                                                                      |
| Vigneswaran et al., 2021 | Case Series               |                   | Paraesophageal hernias<br>Chicago, USA                                                                                                     | 2           | N/A                                         | 70.5 (50%)               | Paraesophageal hernia                                                                                                        | N/A                                      | 5 m                                         | Technique,<br>Outcomes/complications                                    | No signs of recurrence at 5 m f/u<br>No adverse effects of harvesting posterior rectus sheath                                                                                                            | Short f/u; no abdominal CT scans for better post-op clinical evaluation and to evaluate role of mesh  |
| Patel et al., 2012       | case report               | IV                | Rectus abdominis harvest for lower extremity defect<br>Ohio, USA                                                                           | 1           | N/A                                         | 30 (100%)                | N/A                                                                                                                          | N/A                                      | 6 mo.                                       | Not reported                                                            | No hernia or bulge<br>No infections noted                                                                                                                                                                | Short followup and only 1 patient limits the validity of this study<br>Setup time: 20 min.            |
| Gundlapalli et al., 2018 | case report               | IV                | Robotic harvest of deep inferior epigastric perforator flap<br>South Carolina, USA                                                         | 1           | N/A                                         | 51 (100%)                | N/A                                                                                                                          | N/A                                      | 9 mo.                                       | Not reported                                                            | No flap or donor-site complications<br>No hernia or bulge                                                                                                                                                | Robotic pedicle dissection: 40 min.<br>Traditional DIEP cost: \$14,800<br>Robotic DIEP cost: \$16,300 |
| Özkan et al., 2019       | case report               | IV                | Robotic harvest of omental flap for extremity coverage<br>Istanbul, Turkey                                                                 | 1           | N/A                                         | 58 (0%)                  | N/A                                                                                                                          | N/A                                      | 12 mo.                                      | Not reported                                                            | No flap or donor-site complications<br>No infection                                                                                                                                                      | Total operative time: 2.5 hrs                                                                         |
| Day et al., 2021         | case report               | IV                | Robotic harvest of a pedicled omentum flap for chest wall defect<br>Minnesota, USA                                                         | 1           | N/A                                         | 68 (100%)                | N/A                                                                                                                          | N/A                                      | 2 mo.                                       | Disease recurrence<br>Flap or donor-site complications                  | No intra- or postoperative complications<br>Patient died 3 months postop due to metastatic disease                                                                                                       |                                                                                                       |

| Author (Year)            | Type of Study | Level of Evidence | Population                                                  | Cohort size | Control group | Mean age (% female) | Inclusion Criteria                                                                  | Exclusion Criteria | Mean Follow-Up | Outcomes Measured                                                                                               | Results                                                                                                                                                                                                                                                | Comments                                                                    |
|--------------------------|---------------|-------------------|-------------------------------------------------------------|-------------|---------------|---------------------|-------------------------------------------------------------------------------------|--------------------|----------------|-----------------------------------------------------------------------------------------------------------------|--------------------------------------------------------------------------------------------------------------------------------------------------------------------------------------------------------------------------------------------------------|-----------------------------------------------------------------------------|
| Facca & Liverneaux, 2010 | Case Report   | IV                | Man with hypothenar hammar syndrome<br>Strasbourg, France   | 1           | N/A           | 39                  | Hypothenar hammar syndrome                                                          | N/A                | 6 months       | Postoperative after-effects<br>Improvement in paresthesias, vasomotor disorders, and cold-related pain episodes | No postoperative after-effects reported<br>Vasomotor disorders disappeared immediately after surgery<br>Progressive regression of paresthesis in L ulnar nerve after 2m<br>Some infrequent persistent cold-related pain episodes at 6m postoperatively |                                                                             |
| Naito et al., 2020       | Case Report   | IV                | Patient with brachial plexus injury<br>Tokyo, Japan         | 1           | N/A           | 57                  | Patient with brachial plexus injury, need for intercostal n. harvest                | N/A                | N/A            | Outcomes/complications                                                                                          | No respiratory complications, no pain at nerve-harvesting site; patient could ambulate freely POD 1; good patient satisfaction                                                                                                                         | Specialized technique, small sample size                                    |
| Yilmaz et al., 2020      | Case Report   | IV                | Patient with need for penile replantation<br>Ankara, Turkey | 1           | N/A           | 35                  | Patient with need for penile replantation                                           | N/A                | 6 weeks        | Outcomes/complications                                                                                          | Patient could form an erection, no stricture or fistula on voiding cystourethrogram<br>No hematoma or glans necrosis, some necrotic penile skin was debrided and recon. with a fasciocutaneous flap                                                    | Small sample size                                                           |
| Teven et al., 2021       | Case Report   | IV                | Patient with lower extremity lymphedema<br>Pheonix, Arizona | 1           | N/A           | 52                  | Patient with need for omentum lymphatic transplant                                  | N/A                | 10 weeks       | Outcomes/complications, operative time                                                                          | Robotic harvest: 80 mins<br>100mL blood loss<br>Patient discharged 24 h after surgery with full ambulation<br>At 10 wk, incisions healed, sig. improvement in lymphedema symptoms                                                                      | Small sample size, short f/u time                                           |
| Chang et al., 2021       | Case Report   | IV                | Patient with palmar hyperhidrosis<br>Taoyuan, Taiwan        | 1           | N/A           | 59                  | Patient with need for sympathetic trunk reversal reconstruction with sural n. graft | N/A                | 42 months      | Outcomes/complications                                                                                          | At 24, 33, and 42 m postoperatively, symptoms improved by 70%<br>No intra or post-operative complications, pt discharged POD 4                                                                                                                         | Robot use requires healthy n. stump, reliable technique in order to be safe |
